# Supplementary material for: Visible light-induced hole transfer in single-nanoplate Cu1.81S–CdS heterostructures
Source: Royal Society of Chemistry journal article supplement (doi:10.1039/d3nr06450f), 2024-01-01
Supplement: d3nr06450f1.pdf [file d3nr06450f1.pdf]

## Supporting Information for

# Visible light-induced hole transfer in single-nanoplate $\text{Cu}_{1.81}\text{S}$ - CdS heterostructures

*Chang Wang,<sup>a</sup> Zhaozhe Chen,<sup>a</sup> Si Xiao,<sup>a,\*</sup> and Jun He,<sup>a,\*</sup>*

<sup>a</sup> Hunan Key Laboratory of Nanophotonics and Devices, School of Physics, Central South University, Changsha 410083, China.

\*Corresponding authors.

Si Xiao , Email: [sixiao@csu.edu.cn](mailto:sixiao@csu.edu.cn)

Jun He , Email: [junhe@csu.edu.cn](mailto:junhe@csu.edu.cn)

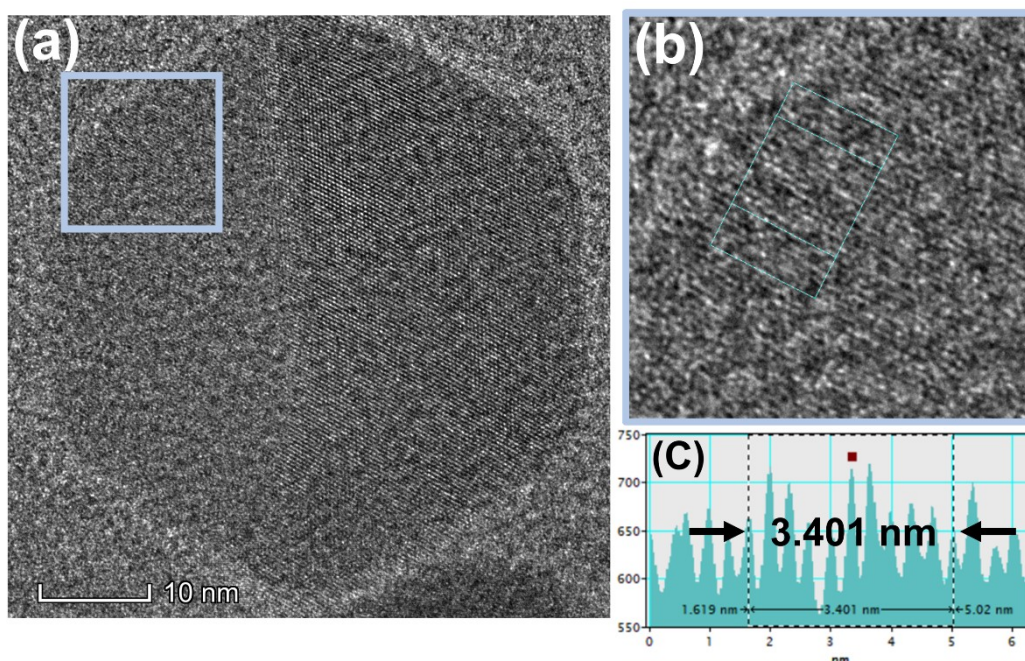

Figure S1: (a) HRTEM images of a single nanoplake  $\text{Cu}_{1.81}\text{S}-\text{CdS}$ . (b) Lattice fringes in the corresponding blue region. (c) Length of ten lattice fringes.

### **Density functional theory calculations**

Calculations were performed using the Vienna Ab initio Simulation Package (VASP).<sup>1</sup> The Perdew–Burke–Ernzerhof (PBE) standard functional is used as the exchange–correlation functional. A plane-wave cutoff of 400 eV was used for all calculations.<sup>2</sup> The convergence criteria for the electronic self-consistent iteration and the residual force on each relaxed atom were set to  $10^{-4}$  eV and 0.03 eV/Å, respectively.<sup>3</sup> The (002) surface of CdS and the (400) surface of  $\text{Cu}_{1.81}\text{S}$  were used for modelling. The crystal structures of CdS and  $\text{Cu}_{1.81}\text{S}$  were taken from literature [4] and [5], respectively. A vacuum spacing of 30 Å in the slab was set to separate the surface along a perpendicular direction. A single k-point ( $\Gamma$ -point) was adopted for the Brillouin-zone sampling,<sup>6</sup> which was appropriate for the slab model with rather large surface unit cell.

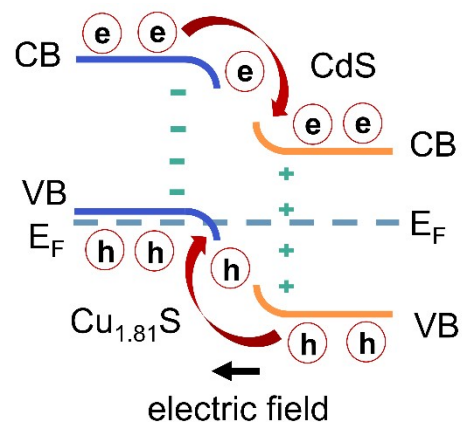

Figure S2: schematic illustration of charge separation at the interface of  $\text{Cu}_{1.81}\text{S}$ - $\text{CdS}$ .

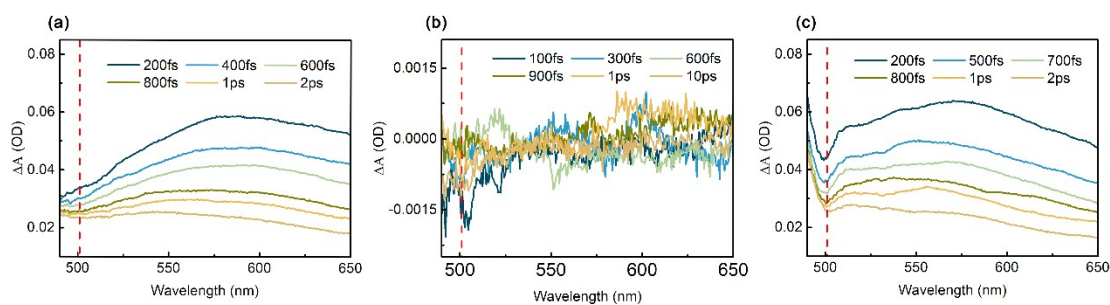

Figure S3. TA spectra of  $\text{Cu}_{1.81}\text{S}$  (a), CdS (b), and  $\text{Cu}_{1.81}\text{S-CdS}$  (c) were recorded at selected delay times following 1300 nm laser excitation.

Fig. S3 shows the TA spectra of  $\text{Cu}_{1.81}\text{S}$ , CdS and  $\text{Cu}_{1.81}\text{S-CdS}$  after selective excitation of the localized surface plasmon resonance band by a 1300 nm laser. At this point, the CdS nanoplates showed no significant absorption signal, indicating that they were not excited. Whereas, a broad absorption peak can be observed in  $\text{Cu}_{1.81}\text{S}$  nanoplates, indicating that copper sulphide is selectively excited. It is noteworthy that a significant dip can be seen in the CdS excitonic peak region after localized surface plasmon resonance excitation. The dip in the TAS to CdS bleaching caused by state-filling<sup>7</sup> derived from electron transfer from the  $\text{Cu}_{1.81}\text{S}$  to CdS phases under 1300 nm laser excitation.<sup>8</sup>

## References

1. W. K. a. L. J. Sham. *Phys. Rev.* 1965, **140**, A1133– A1138.
2. S.-K. Han; C. Gu; S. Zhao; S. Xu; M. Gong; Z. Li; S.-H. Yu. *J. Am. Chem. Soc.* 2016, **138**, 12913-12919.
3. Y. Chen; S. Zhao; X. Wang; Q. Peng; R. Lin; Y. Wang; R. Shen; X. Cao; L. Zhang; G. Zhou; J. Li; A. Xia; Y. Li. *J. Am. Chem. Soc.* 2016, **138**, 4286-4289.
4. Xu; Ching. *Phys. Rev. B* 1993, **48**, 4335-4351.
5. W. G. Mumme; R. W. Gable; V. Petricek. *Can. Mineral.* 2012, **50**, 423-430.
6. H. J. M. a. J. D. Pack. *Phys. Rev. B* 1976, **13**, 5188.
7. Z. Lian; M. Sakamoto; Y. Kobayashi; N. Tamai; J. Ma; T. Sakurai; S. Seki; T. Nakagawa; M. Lai; M. Haruta; H. Kurata; T. Teranishi. *J. Phys. Chem. Lett.* 2018, **9**, 2212-2217.
8. Z. Lian; M. Sakamoto; J. J. M. Vequizo; C. S. K. Ranasinghe; A. Yamakata; T. Nagai; K. Kimoto; Y. Kobayashi; N. Tamai; T. Teranishi. *J. Am. Chem. Soc.* 2019, **141**, 2446-2450.
